# Supplementary material for: BiFC Method Based on Intraorganellar Protein Crowding Detects Oleate-Dependent Peroxisomal Targeting of Pichia pastoris Malate Dehydrogenase
Source: MDPI journal article supplement (doi:10.3390/ijms22094890), 2021-05-05
Supplement: s1 [file s1]

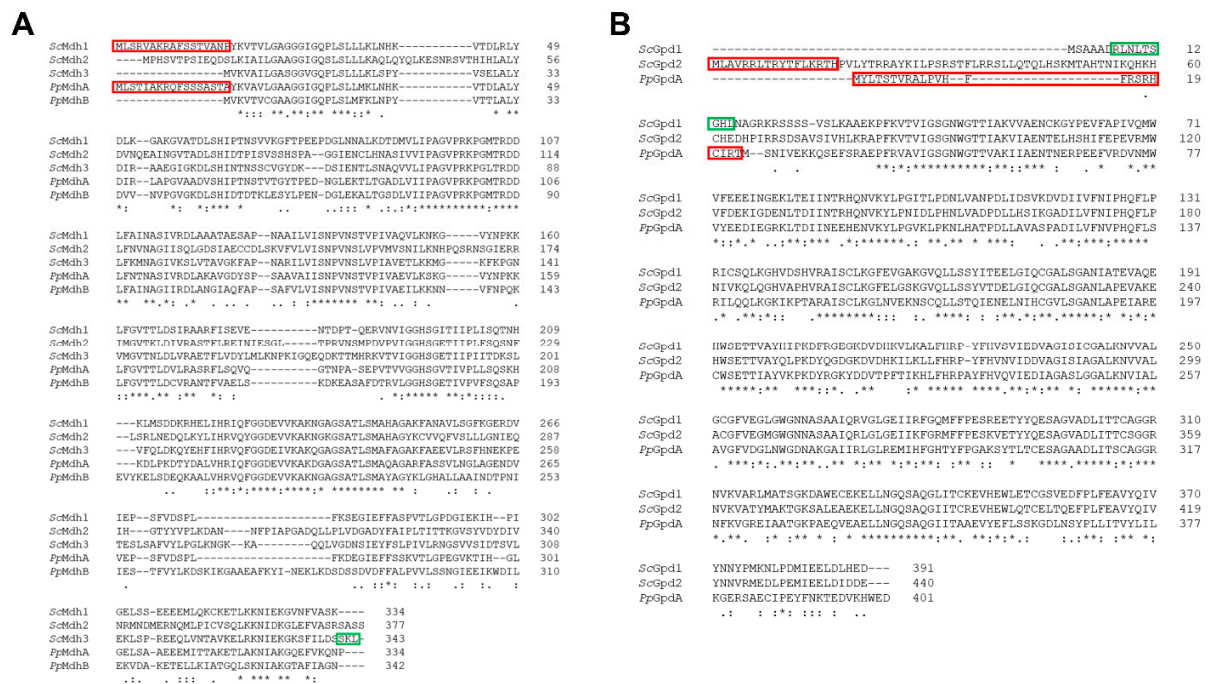

**Figure S1.** Sequence homologies between dehydrogenases implicated in NADH-shuttling in *P. pastoris* and *S. cerevisiae*. (A) Malate dehydrogenases for *S. cerevisiae* (NP\_012838.1, NP\_014515.2, and NP\_010205.1) and *P. pastoris* (XP\_002491128.1 and XP\_002494265.1). (B) Glycerol 3-phosphate dehydrogenases for *S. cerevisiae* (NP\_010262.1 and NP\_014582.1) and *P. pastoris* (XP\_002492095.1). Protein sequences were aligned using the Clustal Omega Multiple Clustal Alignment. \* indicates identity and : denotes similarity. Mitochondrial presequences are highlighted in red, and peroxisomal targeting signals are depicted in green.

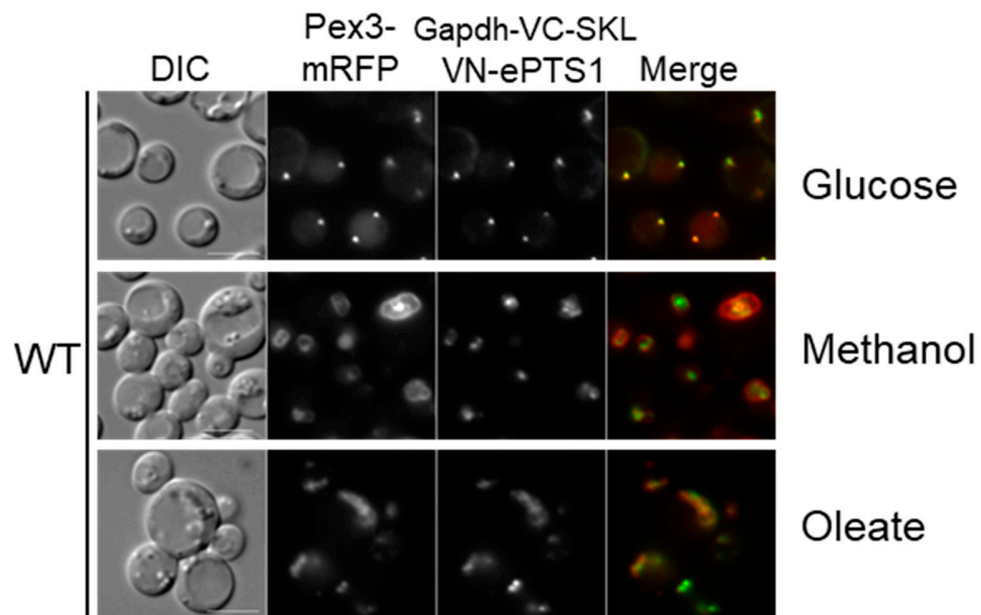

**Figure S2.** Gapdh-VC with a C-terminal SKL is capable of interaction with VN-ePTS1 at the peroxisome. Strains were grown in glucose, methanol, and oleate overnight. Peroxisomes were visualized using Pex3-mRFP. Bars: 5  $\mu$ m.

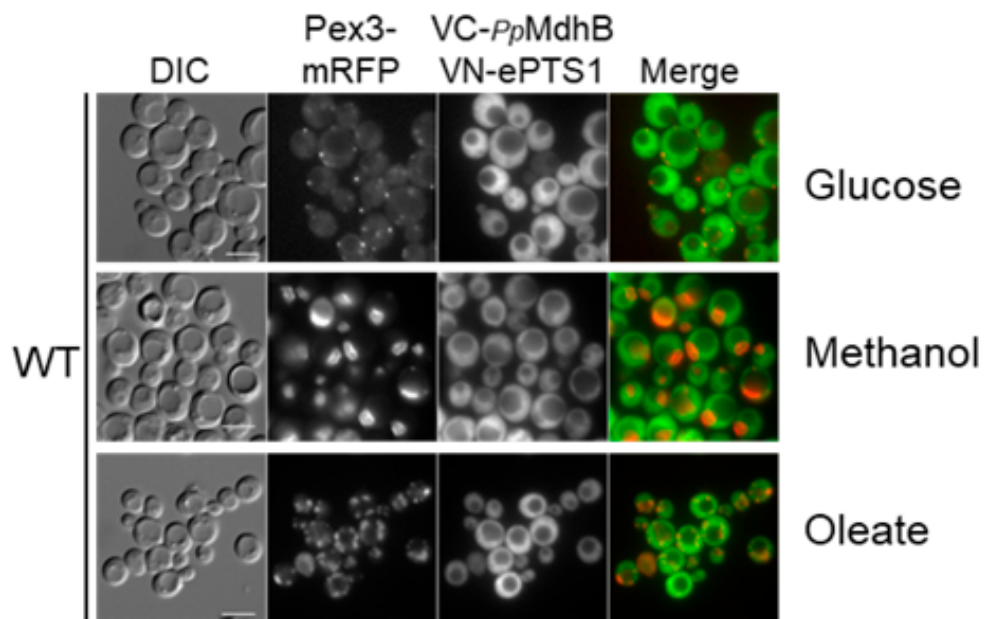

**Figure S3.** *Pp*MdhB fused with VC at its N-terminus shows only cytosolic localization using the divergent BiFC assay. Strains were grown overnight in glucose, methanol, and oleate. Peroxisomes were visualized using Pex3-mRFP. Bars: 5  $\mu$ m.

**Table S1.** Yeast strains.

| <i>Yeast Strains</i> | <i>Description</i>                                                                                                                                         | <i>Source</i> |
|----------------------|------------------------------------------------------------------------------------------------------------------------------------------------------------|---------------|
| <i>GS115</i>         | <i>his4</i>                                                                                                                                                | Lab stock     |
| <i>PPY12h</i>        | <i>his4 arg4</i>                                                                                                                                           | Lab stock     |
| <i>Δpex7</i>         | <i>Δpex7::ARG4 his4</i>                                                                                                                                    | Lab stock     |
| <i>JC404</i>         | <i>Δpex14::ARG4 his4</i>                                                                                                                                   | Lab stock     |
| <i>sPL66</i>         | GS115 + pJCF235-Zeo (P <sub>PEX3</sub> - <i>Pex3-mRFP</i> )::HIS4(Zeocin <sup>R</sup> ) + pPL21 (P <sub>HTX1</sub> - <i>Gapdh-VC</i> + VN-ePTS1)::HIS4     | This study    |
| <i>sPL67</i>         | GS115 + pJCF235-Zeo (P <sub>PEX3</sub> - <i>Pex3-mRFP</i> )::HIS4(Zeocin <sup>R</sup> ) + pPL14 (P <sub>HTX1</sub> - <i>Pot1-VC</i> + VN-ePTS1)::HIS4      | This study    |
| <i>sPL68</i>         | GS115 + pJCF235-Zeo (P <sub>PEX3</sub> - <i>Pex3-mRFP</i> )::HIS4(Zeocin <sup>R</sup> ) + pPL18 (P <sub>HTX1</sub> - <i>MdhA-VC</i> + VN-ePTS1)::HIS4      | This study    |
| <i>sPL69</i>         | GS115 + pJCF235-Zeo (P <sub>PEX3</sub> - <i>Pex3-mRFP</i> )::HIS4(Zeocin <sup>R</sup> ) + pPL19 (P <sub>HTX1</sub> - <i>MdhB-VC</i> + VN-ePTS1)::HIS4      | This study    |
| <i>sPL70</i>         | GS115 + pJCF235-Zeo (P <sub>PEX3</sub> - <i>Pex3-mRFP</i> )::HIS4(Zeocin <sup>R</sup> ) + pPL20 (P <sub>HTX1</sub> - <i>GpdA-VC</i> + VN-ePTS1)::HIS4      | This study    |
| <i>sPL75</i>         | Δpex7 + pJCF235-Zeo (P <sub>PEX3</sub> - <i>Pex3-mRFP</i> )::HIS4(Zeocin <sup>R</sup> ) + pPL14 (P <sub>HTX1</sub> - <i>Pot1-VC</i> + VN-ePTS1)::HIS4      | This study    |
| <i>sPL77</i>         | Δpex7 + pJCF235-Zeo (P <sub>PEX3</sub> - <i>Pex3-mRFP</i> )::HIS4(Zeocin <sup>R</sup> ) + pPL19 (P <sub>HTX1</sub> - <i>MdhB-VC</i> + VN-ePTS1)::HIS4      | This study    |
| <i>sPL79</i>         | JC404 + pJCF235-Zeo (P <sub>PEX3</sub> - <i>Pex3-mRFP</i> )::HIS4(Zeocin <sup>R</sup> ) + pPL14 (P <sub>HTX1</sub> - <i>Pot1-VC</i> + VN-ePTS1)::HIS4      | This study    |
| <i>sPL81</i>         | JC404 + pJCF235-Zeo (P <sub>PEX3</sub> - <i>Pex3-mRFP</i> )::HIS4(Zeocin <sup>R</sup> ) + pPL19 (P <sub>HTX1</sub> - <i>MdhB-VC</i> + VN-ePTS1)::HIS4      | This study    |
| <i>sPL93</i>         | GS115 + pJCF235-Zeo (P <sub>PEX3</sub> - <i>Pex3-mRFP</i> )::HIS4(Zeocin <sup>R</sup> ) + pPL23 (P <sub>HTX1</sub> - <i>VC-MdhB</i> + VN-ePTS1)::HIS4      | This study    |
| <i>sJCF2169</i>      | PPY12h + pJCF523(P <sub>TOM20</sub> - <i>Tom20-2xmCherry</i> )::ARG4(Hygro <sup>R</sup> ) pJCF402 (P <sub>GAPDH</sub> - <i>BFP-SKL</i> )::ARG4 <i>his4</i> | This study    |
| <i>sJCF2771</i>      | sJCF2169 + pPL26(P <sub>AOX1</sub> - <i>MdhB-GFP</i> )::HIS4                                                                                               | This study    |
| <i>sJCF2683</i>      | sJCF2169 + pJCF855(P <sub>GPD</sub> - <i>GpdA-GFP</i> )::HIS4                                                                                              | This study    |
| <i>sJCF2682</i>      | sJCF2169 + pJCF854(P <sub>MDHA</sub> - <i>MdhA-GFP</i> )::HIS4                                                                                             | This study    |
| <i>sJCF2770</i>      | sJCF2169 + pJCF853(P <sub>MDHB</sub> - <i>MdhB-GFP</i> )::HIS4                                                                                             | This study    |
| <i>sJCF2772</i>      | GS115 + pJCF235-Zeo (P <sub>PEX3</sub> - <i>Pex3-mRFP</i> )::HIS4(Zeocin <sup>R</sup> ) + pJCF856 (P <sub>HTX1</sub> - <i>Gapdh-VC</i> + VN-ePTS1)::HIS4   | This study    |

**Table S2.** Plasmids.

| <i>Plasmid</i>     | <i>Description</i>                                                                       | <i>Source</i> |
|--------------------|------------------------------------------------------------------------------------------|---------------|
| <i>pPL14</i>       | P <sub>HTX1</sub> - <i>Pot1-VC</i> + VN-ePTS1, HIS4, AMP <sup>R</sup>                    | This study    |
| <i>pPL18</i>       | P <sub>HTX1</sub> - <i>MdhA-VC</i> + VN-ePTS1, HIS4, AMP <sup>R</sup>                    | This study    |
| <i>pPL19</i>       | P <sub>HTX1</sub> - <i>MdhB-VC</i> + VN-ePTS1, HIS4, AMP <sup>R</sup>                    | This study    |
| <i>pPL20</i>       | P <sub>HTX1</sub> - <i>GpdA-VC</i> + VN-ePTS1, HIS4, AMP <sup>R</sup>                    | This study    |
| <i>pPL21</i>       | P <sub>HTX1</sub> - <i>Gapdh-VC</i> + VN-ePTS1, HIS4, AMP <sup>R</sup>                   | This study    |
| <i>pPL23</i>       | P <sub>HTX1</sub> - <i>VC-MdhB</i> + VN-ePTS1, HIS4, AMP <sup>R</sup>                    | This study    |
| <i>pPL26</i>       | P <sub>AOX1</sub> - <i>MdhB-GFP</i> , HIS4, AMP <sup>R</sup>                             | This study    |
| <i>pJCF235-ZEO</i> | P <sub>PEX3</sub> - <i>Pex3-mRFP</i> , HIS4/Zeocin <sup>R</sup> , AMP <sup>R</sup>       | Lab stock     |
| <i>pJCF402</i>     | P <sub>GAPDH</sub> - <i>BFP-SKL</i> , ARG4, AMP <sup>R</sup>                             | Lab stock     |
| <i>pJCF523</i>     | P <sub>TOM20</sub> - <i>Tom20-2xmCherry</i> , ARG4/Hygro <sup>R</sup> , AMP <sup>R</sup> | Lab stock     |
| <i>pJCF853</i>     | P <sub>MDHA</sub> - <i>MdhA-GFP</i> , HIS4, AMP <sup>R</sup>                             | This study    |
| <i>pJCF854</i>     | P <sub>MDHA</sub> - <i>MdhA-GFP</i> , HIS4, AMP <sup>R</sup>                             | This study    |
| <i>pJCF855</i>     | P <sub>GPD</sub> - <i>GpdA-GFP</i> , HIS4, AMP <sup>R</sup>                              | This study    |
| <i>pJCF856</i>     | P <sub>HTX1</sub> - <i>Gapdh-VC-SKL</i> + VN-ePTS1, HIS4, AMP <sup>R</sup>               | This study    |
